# Supplementary material
Source: publisher figshare collection journal article supplement (https://karger.figshare.com/ndownloader/files/19032821)
Supplement: Supplementary file 1 [file 19032821]

## SUPPLEMENTAL MATERIAL

**Table 1. Search Strategy**

|                    |                                                                                                                                                                                                                                                                                                                                                                                                                                                                                                                                                                                                                                                                                                                                                                                                                                                                                                                                                                                                                   |
|--------------------|-------------------------------------------------------------------------------------------------------------------------------------------------------------------------------------------------------------------------------------------------------------------------------------------------------------------------------------------------------------------------------------------------------------------------------------------------------------------------------------------------------------------------------------------------------------------------------------------------------------------------------------------------------------------------------------------------------------------------------------------------------------------------------------------------------------------------------------------------------------------------------------------------------------------------------------------------------------------------------------------------------------------|
| Pubmed (n=5241)    |                                                                                                                                                                                                                                                                                                                                                                                                                                                                                                                                                                                                                                                                                                                                                                                                                                                                                                                                                                                                                   |
| Stroke             | (stroke[mh] OR stroke[Title])                                                                                                                                                                                                                                                                                                                                                                                                                                                                                                                                                                                                                                                                                                                                                                                                                                                                                                                                                                                     |
| Comorbidity        | (multiple chronic conditions[mh] OR multiple chronic conditions[tiab] OR multimorbidity[tiab] OR comorbidity[mh] OR comorbidity[tiab] OR comorbid conditions[tiab] OR comorbid diseases[tiab] OR comorbid illnesses[tiab] OR premorbid condition[tiab] OR premorbid disease[tiab] OR premorbid illness[tiab] OR pre-morbid condition[tiab] OR pre-morbid disease[tiab] OR pre-morbid illness[tiab] OR preexist condition[tiab] OR preexist disease[tiab] OR preexist illness[tiab] OR pre-exist condition[tiab] OR pre-exist disease[tiab] OR pre-exist illness[tiab] OR pre-existing condition[tiab] OR pre-existing disease[tiab] OR pre-existing illness[tiab] OR Predict[tiab] OR Predictor[tiab] OR Predicting[tiab] OR Prediction[tiab] OR Predictive[tiab] OR adjust*[tiab] OR Multivariate Analysis[MeSH Terms] OR regression analysis[MeSH Terms])                                                                                                                                                       |
| Functional outcome | (Disability Evaluation[MeSH Terms] OR Recovery of Function[MeSH Terms] OR Activities of Daily Living[mh] OR Functional outcome[tiab] OR Functional independence[tiab] OR Functional independent[tiab] OR Functional dependence[tiab] OR Functional dependent[tiab] OR Functional limited[tiab] OR Functional limitation[tiab] OR Functional impairment[tiab] OR Functional impaired[tiab] OR Functional disabled[tiab] OR Functional disability[tiab] OR Functional ability[tiab] OR Functional recovery[tiab] OR Rankin[tiab] OR mRS[tiab] OR FIM[tiab] OR Barthel[tiab])                                                                                                                                                                                                                                                                                                                                                                                                                                        |
| Filter             | Filters: Publication date from 1990/01/01 to 2017/12/03                                                                                                                                                                                                                                                                                                                                                                                                                                                                                                                                                                                                                                                                                                                                                                                                                                                                                                                                                           |
| Embase (n=5331)    |                                                                                                                                                                                                                                                                                                                                                                                                                                                                                                                                                                                                                                                                                                                                                                                                                                                                                                                                                                                                                   |
| Stroke             | ('cerebrovascular accident'/exp OR 'stroke':ab,ti)                                                                                                                                                                                                                                                                                                                                                                                                                                                                                                                                                                                                                                                                                                                                                                                                                                                                                                                                                                |
| Comorbidity        | ('multiple chronic conditions':ti,ab,kw OR 'multimorbidity':ti,ab,kw OR 'comorbidity':ti,ab,kw OR 'comorbid conditions':ti,ab,kw OR 'comorbid diseases':ti,ab,kw OR 'comorbid illnesses':ti,ab,kw OR 'premorbid condition':ti,ab,kw OR 'premorbid disease':ti,ab,kw OR 'premorbid illness':ti,ab,kw OR 'pre-morbid condition':ti,ab,kw OR 'pre-morbid disease':ti,ab,kw OR 'pre-morbid illness':ti,ab,kw OR 'preexist condition':ti,ab,kw OR 'preexist disease':ti,ab,kw OR 'preexist illness':ti,ab,kw OR 'pre-exist condition':ti,ab,kw OR 'pre-exist disease':ti,ab,kw OR 'pre-exist illness':ti,ab,kw OR 'pre-existing condition':ti,ab,kw OR 'pre-existing disease':ti,ab,kw OR 'pre-existing illness':ti,ab,kw OR 'predict':ti,ab,kw OR 'predictor':ti,ab,kw OR 'predicting':ti,ab,kw OR 'prediction':ti,ab,kw OR 'predictive':ti,ab,kw OR 'adjust':ti,ab,kw OR 'adjustment':ti,ab,kw OR 'adjusting':ti,ab,kw OR 'adjusted':ti,ab,kw OR 'multivariate analysis':ti,ab,kw OR 'regression analysis':ti,ab,kw) |
| Functional outcome | ('disability':ti,ab,kw OR 'recovery of function':ti,ab,kw OR 'activities of daily living':ti,ab,kw OR 'functional outcome':ti,ab,kw OR 'functional independence':ti,ab,kw OR 'functional independent':ti,ab,kw OR 'functional dependence':ti,ab,kw OR 'functional dependent':ti,ab,kw OR 'functional limited':ti,ab,kw OR 'functional limitation':ti,ab,kw OR 'functional impairment':ti,ab,kw OR 'functional impaired':ti,ab,kw OR 'functional disabled':ti,ab,kw OR 'functional disability':ti,ab,kw OR 'functional ability':ti,ab,kw OR 'functional recovery':ti,ab,kw OR 'rankin':ti,ab,kw OR 'mrs':ti,ab,kw OR 'fim':ti,ab,kw OR 'barthel':ti,ab,kw)                                                                                                                                                                                                                                                                                                                                                         |
| Filter             | AND [article]/lim AND [english]/lim AND [1-1-1990]/sd NOT [3-12-2017]/sd                                                                                                                                                                                                                                                                                                                                                                                                                                                                                                                                                                                                                                                                                                                                                                                                                                                                                                                                          |

**Table 2. Quality Appraisal Checklist**

| Risk of Bias Assessment of the Included Studies               |        |                                                                                                                                                                                                                                                                                                                                                                                                                                                                                                                                        |
|---------------------------------------------------------------|--------|----------------------------------------------------------------------------------------------------------------------------------------------------------------------------------------------------------------------------------------------------------------------------------------------------------------------------------------------------------------------------------------------------------------------------------------------------------------------------------------------------------------------------------------|
| Evaluation of                                                 | Scale* | Risk of Bias Criteria                                                                                                                                                                                                                                                                                                                                                                                                                                                                                                                  |
| <b>1. Study Participation</b>                                 |        |                                                                                                                                                                                                                                                                                                                                                                                                                                                                                                                                        |
| D1 Source population                                          | H/M/L  | <u>Low</u> if the study was population or community-based;<br><u>Medium</u> if the study was multi/single-centered and hospital-based<br><u>High</u> if the study was multi/single-centered and rehabilitation-based; <u>or</u> was done in veterans/ad hoc analysis of clinical trials                                                                                                                                                                                                                                                |
| D2 Prospective design                                         | H/L    | <u>Low</u> when a prospective cohort design was used<br><u>High</u> when retrospective <u>or</u> cross-sectional study design was used;                                                                                                                                                                                                                                                                                                                                                                                                |
| D3 Inclusion and exclusion criteria                           | H/L    | <u>Low</u> if all ischemic stroke cases from the study time frame were eligible;<br><u>Medium</u> if patients were excluded due to factors other than their status of comorbidity, stroke severity, age, treatment or rehabilitation;<br><u>High</u> if patients were excluded due to the status of comorbidity, stroke severity, treatment or rehabilitation; or if patients were excluded due to other restriction on age (other than age $\geq 18$ );                                                                               |
| D4 Recruitment                                                | H/L    | <u>Low</u> if all recruitment information (place, time-period, and methods used to identify ischemic stroke cases) were reported.<br><u>High</u> if any one aspect of the recruitment information was missing.                                                                                                                                                                                                                                                                                                                         |
| D5 Important baseline characteristics of the study population | H/M/L  | <u>Low</u> if all of the following key characteristics of the study population were described, including the distributions of gender, age, stroke type, stroke severity and history of strokes*;<br><u>Medium</u> if any one of the key characteristics was missing;<br><u>High</u> if two or more of the key characteristics were missing;<br>*history of strokes was adequate when the study reported if patients with 'history of stroke', 'recurrent stroke' or 'cerebrovascular disease' as a comorbidity were included/excluded; |
| <b>2. Study attrition</b>                                     |        |                                                                                                                                                                                                                                                                                                                                                                                                                                                                                                                                        |
| A1 Proportion of loss to follow-up                            | H/L    | <u>Low</u> if the number of loss to follow-up is $\leq 20\%$ .                                                                                                                                                                                                                                                                                                                                                                                                                                                                         |
| A2 Reasons for loss to follow-up                              | H/L    | <u>Low</u> if reasons for loss to follow-up were specified, <u>or</u> there was no loss to follow-up<br><u>High</u> if reasons for loss to follow-up were not specified even if the number of loss to follow-up is $\leq 20\%$ .                                                                                                                                                                                                                                                                                                       |
| A3 Methods dealing with missing data                          | H/M/L  | <u>Low</u> if methods of dealing with missing values were presented (e.g. multiple imputations), <u>or</u> there were no missing values.<br><u>Medium</u> if the study conducted using complete-case analysis <u>and</u> the proportion of missing data is 5% or less; <sup>1-3</sup><br><u>High</u> if the complete-case analysis was conducted <u>and</u> the proportion of missing data is more than 5%; <sup>1-3</sup>                                                                                                             |
| A4 Comparison completers and non-completers                   | H/L    | <u>Low</u> if there were no significant differences between participants who completed the study and who did not, concerning key characteristics gender, age, and stroke severity, MCCs and functional status, <u>or</u> there was the number of follow-ups is $\leq 20\%$ , <u>or</u> if methods (e.g. inverse probability weighting) or sensitivity analysis were used to consider loss to follow-up.                                                                                                                                |
| <b>3. MCC measurement</b>                                     |        |                                                                                                                                                                                                                                                                                                                                                                                                                                                                                                                                        |
| M1 Definition of MCC                                          | H/L    | <u>Low</u> if the measurement of MCC was clearly defined.                                                                                                                                                                                                                                                                                                                                                                                                                                                                              |
| M2 Temporality                                                | H/L    | <u>Low</u> if MCC conditions were identified before or during the index stroke;<br><u>High</u> if MCC conditions were identified at rehabilitation admission;                                                                                                                                                                                                                                                                                                                                                                          |
| M3 MCC weighting                                              | H/L    | <u>Low</u> if conditions included in the MCC measurement indices were weighted in the calculation of an MCC score;                                                                                                                                                                                                                                                                                                                                                                                                                     |
| M4 Scoring scheme and cut-off points                          | H/L    | <u>Low</u> if the scoring scheme for MCC were defined, including cut-off points <u>and</u> rationale for cut-off points was given;                                                                                                                                                                                                                                                                                                                                                                                                     |
| M5 presentation                                               | H/L    | <u>Low</u> if frequencies, percentages, mean (SD/CI), or median (IQR) were reported for MCC, <u>or</u> for each condition included in the MCC index.                                                                                                                                                                                                                                                                                                                                                                                   |

|                                                                                                                                                                             |       |                                                                                                                                                                                                                                                                                                                                                                                                                                       |
|-----------------------------------------------------------------------------------------------------------------------------------------------------------------------------|-------|---------------------------------------------------------------------------------------------------------------------------------------------------------------------------------------------------------------------------------------------------------------------------------------------------------------------------------------------------------------------------------------------------------------------------------------|
| <b>4. Outcome measurement</b>                                                                                                                                               |       |                                                                                                                                                                                                                                                                                                                                                                                                                                       |
| O1 Definition of outcome                                                                                                                                                    | H/L   | <u>Low</u> when the functional outcome was clearly defined.                                                                                                                                                                                                                                                                                                                                                                           |
| O2 Functional outcome assessment                                                                                                                                            | H/L   | <u>Low</u> when there's no differential assessment for patient included.<br><u>High</u> when outcome assessment was different for included patients, <u>or</u> if the proxy were used in the outcome assessment.                                                                                                                                                                                                                      |
| O3 Scoring scheme and cut-off points described                                                                                                                              | H/L   | <u>Low</u> if the scoring scheme of the functional outcome was described, including cut-off points <u>and</u> rationale for cut-off points was given; <u>or</u> if there was no dichotomization or classification.                                                                                                                                                                                                                    |
| O4 Appropriate timing for functional outcome measurement                                                                                                                    | H/L   | <u>Low</u> if the functional outcome was measured at a fixed time-point after stroke onset (e.g. 3 or 6 months);<br><u>High</u> if functional outcome measurement was obtained at hospitalization and rehabilitation discharge.                                                                                                                                                                                                       |
| O5 Data presentation                                                                                                                                                        | H/L   | <u>Low</u> if frequencies, percentages or mean (SD/CI) or median (IQR) were reported of the functional outcome measure.                                                                                                                                                                                                                                                                                                               |
| <b>5. Statistical analysis</b>                                                                                                                                              |       |                                                                                                                                                                                                                                                                                                                                                                                                                                       |
| S1 Sufficient sample size                                                                                                                                                   | H/L   | <u>Low</u> if in multivariate logistic regression analysis number of patients with a positive or negative outcome (event) per variable was adequate, i.e. was equal to or exceeds 10 events per variable in the multivariable model (EPV) <sup>4</sup> , <u>or</u> in case of linear regression analysis, $N \geq 104+m$ , where m is the number of predictor variables. <sup>5, 6</sup>                                              |
| S2 MCC presentation in univariate analysis                                                                                                                                  | H/L   | <u>Low</u> if univariate crude estimates and confidence intervals ( $\beta$ /SE, OR/CI, RR, HR) were reported for MCC;<br><u>High</u> when only p-values or correlation coefficients were given, <u>or</u> if the univariate analysis was not performed at all.                                                                                                                                                                       |
| S3 MCC presentation in multivariable analysis                                                                                                                               | H/L   | <u>Low</u> if for the multivariable models point estimates with confidence intervals ( $\beta$ /SE, OR/CI, RR, HR,) were reported for MCC;<br><u>High</u> when only p-values or correlation coefficients were given, or if no multivariable analysis was performed at all.                                                                                                                                                            |
| S4 MCC analyzed continuously                                                                                                                                                | H/L   | <u>Low</u> if MCC was analyzed continuously (not dichotomously or categorically) in the multivariable model. <sup>7</sup>                                                                                                                                                                                                                                                                                                             |
| <b>6. Study confounding</b>                                                                                                                                                 |       |                                                                                                                                                                                                                                                                                                                                                                                                                                       |
| C1 Controlling for important confounders                                                                                                                                    | H/M/L | <u>Low</u> if both age and stroke severity were controlled in the multivariable model;<br><u>Medium</u> if either age or stroke severity was controlled;<br><u>High</u> if neither age nor stroke severity was controlled; <sup>8</sup> <u>or</u> if no multivariable analysis was performed at all.                                                                                                                                  |
| C2 Confounding measurement                                                                                                                                                  | H/L   | <u>Low</u> if stroke severity was measured in a valid and reliable way to reflect patients' neurological status using either the National Institutes of Health Stroke Scale (NIHSS) <u>or</u> the Canadian Neurological Scale (CNS). <sup>8</sup><br><u>High</u> if stroke severity was assessed in other measurements, <u>or</u> if stroke severity was not controlled, <u>or</u> if no multivariable analysis was performed at all. |
| <b>7. Clinical performance</b>                                                                                                                                              |       |                                                                                                                                                                                                                                                                                                                                                                                                                                       |
| P1 Clinical performance                                                                                                                                                     | H/L   | <u>Low</u> if article provided information concerning $\geq 1$ of the following performance measures: discrimination (e.g. ROC), calibration (e.g. Hosmer-Lemeshow statistic), explained variance, clinical usefulness (e.g. sensitivity, specificity, PPV, NPV)                                                                                                                                                                      |
| *H=High risk of bias (1 point); M=Medium risk of bias (0.5 point); L=low risk of bias (0 point)<br>Total score: The higher the worse for study quality (high risk of bias); |       |                                                                                                                                                                                                                                                                                                                                                                                                                                       |

**Table 3a. Characteristics of the eligible rehabilitation-based studies**

| First author | Year | Country | N   | Source population        | Prospective Study Design | Exclusion criteria                                                                                                             | Year of admission | Stroke type                   | MCC measure                                                                               | Outcome Measure                  | Outcome follow-up             |
|--------------|------|---------|-----|--------------------------|--------------------------|--------------------------------------------------------------------------------------------------------------------------------|-------------------|-------------------------------|-------------------------------------------------------------------------------------------|----------------------------------|-------------------------------|
| Liu          | 1997 | Japan   | 106 | Single-centered          | N                        | Bilateral hemiplegia, ataxia, or no motor involvement                                                                          | 1994-1995         | IS 52 + ICH 51 +IS-2rd to-SAH | LiuCI-w                                                                                   | FIM                              | Discharge                     |
|              |      |         |     |                          |                          |                                                                                                                                |                   |                               | CCI                                                                                       | FIM                              | Discharge                     |
| Desrosiers   | 2002 | Canada  | 102 | Single-centered          | Y                        | Unable to consent; in program<10d; <b>severe comorbidities</b> ; lived far away; too sever impaired to be compliant with rehab | 1997-1999         | mixed                         | LiuCI-modified version                                                                    | Handicap level (LIFE-H)          | 6 months after discharge      |
| Duncan       | 2002 | US      | 123 | Multi-centered; Veterans | Y                        | Including: live place before stroke; medical conditions related to survival; ADLs; post stroke inpatient care/rehab;           | 1998 -1999        | IS 144 + HS 12 + both 1       | CCI                                                                                       | FIM-motor                        | 6 months                      |
|              |      |         | 123 |                          |                          |                                                                                                                                |                   |                               |                                                                                           | SF-36 physical dimension         |                               |
|              |      |         | 122 |                          |                          |                                                                                                                                |                   |                               |                                                                                           | Lawton IADL scale                |                               |
|              |      |         | 66  |                          |                          |                                                                                                                                |                   |                               |                                                                                           | SIS physical domain              | 6 months+2 weeks              |
| Desrosiers   | 2006 | Canada  | 66  | Single-centered          | Y                        | Cognitive status; severe comorbidities                                                                                         | 1997-1999         | mixed                         | CCI-customized: adding communication, oral expression and urinary and faecal incontinence | LIFE-H daily activities subscore | 2-4 years                     |
| Ferriero     | 2006 | Italy   | 85  | Single-centered          | Y                        | ADLs;prestroke independence; excluded: bilateral hemiplegia, brain-stem or cerebellar stroke and without motor involvement     | 2003              | IS 70+HS 15                   | COM-SI                                                                                    | FIM                              | Discharge                     |
|              |      |         |     |                          |                          |                                                                                                                                |                   |                               | LiuCI                                                                                     |                                  |                               |
| Karatepe     | 2008 | Turkey  | 94  | Single-centered          | Y                        | Bilateral hemiplegia; lack of motor involvement; history of stroke                                                             |                   | mixed                         | LiuCI                                                                                     | FIM                              | Mean follow-up: ~32.7+28 days |

**Table 2a. (contd.) Characteristics of the eligible rehabilitation-based studies**

| First author | Univariate analysis | Significance | Effect Estimate (CL) | P       | performance | Multivariate analysis | Significance | Model  | Effect Estimate (CL)       | P      | Adjustment                                                                                                                                                                                     | Model Performance              |
|--------------|---------------------|--------------|----------------------|---------|-------------|-----------------------|--------------|--------|----------------------------|--------|------------------------------------------------------------------------------------------------------------------------------------------------------------------------------------------------|--------------------------------|
| Liu          | Y                   | *            | r= -0.499            | <0.0001 | NR          | Y                     | Y            | Linear | $\beta$ = -0.346 (CL NR)   | <0.001 | days from onset to admission; admission FIM; tape bisection task(TAPE); #=4                                                                                                                    | Adjusted R <sup>2</sup> =0.798 |
|              | Y                   | NS           | r= -0.197            | 0.1036  | NR          | N                     |              |        |                            |        |                                                                                                                                                                                                |                                |
| Desrosiers   | Y                   | *            | r= -0.32             | 0.001   | NR          | Y                     | Y            | Linear | $\beta$ = -0.03 ( )        | 0.049  | Age; Affect-depression manifestation measured by Beck Depression Inventory (BDI); Lower extremity coordination; Length of stay in rehab; Balance;#6                                            | adjusted R2=0.68               |
| Duncan       | N                   |              |                      |         |             | Y                     | N            | Linear | $\beta$ = -1.4 (1.37)      | 0.3091 |                                                                                                                                                                                                | R2=0.38                        |
|              | N                   |              |                      |         |             | Y                     | N            | Linear | $\beta$ = -1.13 (2.14)     | 0.5971 | age; race (% white); full social support; MMSE at baseline; FIM-motor at baseline; Acute/postacute compliance; #9                                                                              | R2=0.24                        |
|              | N                   |              |                      |         |             | Y                     | N            | Linear | $\beta$ = -0.24 (0.41)     | 0.5565 |                                                                                                                                                                                                | R2=0.41                        |
|              | N                   |              |                      |         |             | Y                     | N            | Linear | $\beta$ = -0.24 (2.52)     | 0.9232 |                                                                                                                                                                                                | R2=0.28                        |
| Desrosiers   | N                   |              |                      |         |             | Y                     | Y            | Linear | $\beta$ = -0.14 (CL NR)    | <0.001 | Age; motor coordination (Finger–Nose test); Upper extremity abilities (four unilateral and five bilateral tasks of the TEMPA); Affect-depression manifestation (Beck Depression Inventory); #5 | Adjusted R <sup>2</sup> =0.53  |
| Ferriero     | Y                   | Y            | r= -0.35             | 0.001   | NR          | Y                     | Y            | Linear | $\beta$ = -6.64 (CL NR)    |        | admission FIM; complications during stay; #3                                                                                                                                                   | Adjusted R <sup>2</sup> =0.82  |
|              | Y                   | Y            | r= -0.39             | 0.0004  | NR          | Y                     | Y            | Linear | $\beta$ = -1.14 (CL NR)    |        | admission FIM; #2                                                                                                                                                                              | Adjusted R <sup>2</sup> =0.80  |
| Karatepe     | Y                   | Y            | r= -0.18             | <0.01   | NR          | Y                     | Y            | Linear | $\beta$ = 6.34 (3.32-9.36) | <0.001 | FIM at baseline (mean=32.7 d after stroke); Stroke severity (CNS at baseline ~32.7d); #3                                                                                                       | R <sup>2</sup> =0.553          |

**Table 3b. Characteristics of the eligible hospital-based studies**

| First author      | Year | Country               | N          | Source population                   | Prospective Study Design | Exclusion criteria                                             | Year of admission           | Stroke type     | MCC measure         | Outcome Measure                                        | Outcome follow-up     |
|-------------------|------|-----------------------|------------|-------------------------------------|--------------------------|----------------------------------------------------------------|-----------------------------|-----------------|---------------------|--------------------------------------------------------|-----------------------|
| Goldstein         | 2004 | US                    | 960        | Multi-centered; Veterans            | Y                        |                                                                | 1995-1997                   | IS              | MCI $\geq 2$        | mRS 2-6 vs. 0-1                                        | Discharge             |
|                   |      |                       |            |                                     |                          |                                                                |                             |                 | MCI                 |                                                        |                       |
| Katan             | 2009 | Switzerland           | 359        | Single-centered                     | Y                        |                                                                | 2006-2007                   | IS              | MCI                 | mRS 0-2 vs. 3-6                                        | 90 days               |
| Fischer           | 2012 | Switzerland           | 481<br>433 | Multi-centered                      | Y                        |                                                                | 2007-2008                   | IS              | CCI<br>CCI          | mRS 0-2 vs. 3-6                                        | 3 months<br>12 months |
| De Marchis        | 2013 | Switzerland & Germany | 783        | Multi-centered                      | Y                        |                                                                | 2009 -2011.                 | IS              | MCI                 | mRS 3-6 vs. 0-2                                        | 90 days               |
| Gensicke          | 2013 | Switzerland           | 257        | Single-centered                     | Y                        | Non-IVT patient                                                | 1988-2007                   | IS              | MCI                 | mRS 0-1 vs. 2-6                                        | 3 months              |
|                   |      |                       |            |                                     |                          |                                                                |                             |                 |                     |                                                        | Long-term; median ~3y |
| Jimenez Caballero | 2013 | Spain                 | 155        | Single-centered                     | Y                        |                                                                | 2009-2011                   | IS+8.6%SICH     | CCI $\geq 2$<br>CCI | mRS $\geq 2$ vs. 0-1                                   | 6 months              |
| Tuttolomondo      | 2013 | Italy                 | 843        | Multi-centered                      | Y                        |                                                                | 1993, 1995, 1997, and 1998; | IS              | CCI                 | no vs. 1-2 ADL impairment                              | Discharge             |
|                   |      |                       |            |                                     |                          |                                                                |                             |                 | CCI<2               |                                                        |                       |
| Nigro             | 2014 | Switzerland           | 344<br>342 | Single-centered                     | Y                        | Non-consent                                                    | 2006-2007                   | IS 342 + TIA 99 | MCI                 | mRS>2                                                  | 90 days               |
|                   |      |                       |            |                                     |                          |                                                                |                             |                 |                     |                                                        | 1 year                |
| Denti             | 2015 | Italy                 | 297        | Single-centered; geriatric patients | N                        | Age; severe comorbidities; standardized clinical pathway (CPW) | 2001-2011                   | IS              | MCI $\geq 2$        | mRS 3-6                                                | 1 months              |
|                   |      |                       |            |                                     |                          |                                                                |                             |                 |                     | mRS 3-5                                                |                       |
|                   |      |                       |            |                                     |                          |                                                                |                             |                 |                     | mRS 3-6                                                |                       |
|                   |      |                       |            |                                     |                          |                                                                |                             |                 |                     | mRS 3-5                                                |                       |
| Lopez-Espuela     | 2015 | Spain                 | 131        | Single-centered                     | Y                        | NIHSS=0; premorbid mRS>2; non-consent to participate           | 2010                        | IS              | CCI                 | SF-12 physical functioning domain (a component of PCS) | 6 months              |
|                   |      |                       |            |                                     |                          |                                                                |                             |                 |                     | SF-12 physical component score (PCS)                   |                       |
| Chang             | 2016 | Korea                 | 2289       | Multi-centered                      | Y                        | onset of symptoms>7 days; non-consent                          | 2012-2014                   | IS              | CCI                 | FIM                                                    | 6 months              |
| López-Espuela     | 2016 | Spain                 | 152        | Single-centered                     | Y                        | non-consent                                                    | 2010                        | IS 160 + HS 15  | CCI                 | BI (grouped for 5 levels of independency)              | 6 months              |

**Table 3b. (contd.) Characteristics of the eligible hospital-based studies**

| First author      | Univariate analysis | Significance | Effect Estimate (CL)   | P       | performance | Multivariate analysis | Significance | Model             | Effect Estimate (CL)   | P                                                                                                                                              | Adjustment                                                                                                                                                                                                                                                                                                             | Model Performance |  |
|-------------------|---------------------|--------------|------------------------|---------|-------------|-----------------------|--------------|-------------------|------------------------|------------------------------------------------------------------------------------------------------------------------------------------------|------------------------------------------------------------------------------------------------------------------------------------------------------------------------------------------------------------------------------------------------------------------------------------------------------------------------|-------------------|--|
| Goldstein         | Y                   | Y            | NR                     | <0.001  | NR          | Y                     | Y            | Logistic          | OR=-1.36 (CL NR)       | 0.038                                                                                                                                          | Stroke severity (CNS); Age; #=3                                                                                                                                                                                                                                                                                        | NR                |  |
|                   | N                   |              |                        |         |             | Y                     | Y            | Logistic          | OR=-1.15 (CL NR)       | <0.005                                                                                                                                         |                                                                                                                                                                                                                                                                                                                        | NR                |  |
| Katan             | Y                   | Y            | OR=1.34 (1.15-1.56)    | <0.0001 | NR          | Y                     | Y            | Logistic          | OR=1.31 (1.09-1.58)    | 0.004                                                                                                                                          | Copeptin level; age; gender; stroke severity; Total anterior circulation syndrome; #=6                                                                                                                                                                                                                                 | AUC=0.85          |  |
| Fischer           | N                   |              |                        |         |             | Y                     | Y            | Logistic          | RR=0.95 (0.92-0.99)    | 0.006                                                                                                                                          | In-hospital vs. prehospital event; gender; age; stroke severity (NIHSS); Family history of stroke/MI; Diabetes; smoking; hyperlipidemia; Hypertension; Thrombolysis threatment; #=15                                                                                                                                   | NR                |  |
|                   | N                   |              |                        |         |             | Y                     | Y            | Logistic          | RR=0.96 (0.91-0.98)    | 0.011                                                                                                                                          |                                                                                                                                                                                                                                                                                                                        |                   |  |
| De Marchis        | Y                   | Y            | NR                     | <0.001  | NR          | Y                     | N            | Logistic          | OR=1.06 (0.89-1.27)    | 0.5                                                                                                                                            | age; Hypertension; Diabetes; Atrial fibrillation; Kidney impairment; stroke severity (NIHSS at admission); total anterior circulation stroke(TACS); Copeptin, glucose and CRP levels; DWI lesion size; stroke onset to blood collection time; gender; unclear cause of stroke; #=16                                    | AUC=0.86          |  |
| Gensicke          | Y                   | Y            | OR=1.604 (1.187-2.167) | <0.05   | NR          | Y                     | N            | Logistic          | OR=1.353 (0.949-1.928) | ≥0.05                                                                                                                                          | age; stroke severity (NIHSS at admission); Glucose levels; Symptomatic intracranial hemorrhage; total anterior circulation stroke(TACS); Hypertension; Coronary artery disease; #=9                                                                                                                                    | NR                |  |
|                   | Y                   | Y            | OR=1.342 (1.014-1.774) | <0.05   | NR          | Y                     | N            | Logistic          | OR=0.849               | ≥0.05                                                                                                                                          | age; stroke severity (NIHSS at admission); CRP levels; SBP at onset; Symptomatic intracranial hemorrhage; total anterior circulation stroke(TACS); Coronary artery disease; Atrial fibrillation; Epileptic seizures; Unfavorable 3M outcome; Long-term follow-up; #=14                                                 | NR                |  |
| Jimenez Caballero | Y                   | Y            | OR=1.373 (CL NR)       | 0.025   | NR          | Y                     | Y            | Logistic          | OR=1.373 (CL NR)       | 0.025                                                                                                                                          | age, sex, stroke severity (NIHSS), hypertension, diabetes mellitus, dyslipidemia, smoking status, subtype of stroke, baseline mRS; #=10                                                                                                                                                                                | NR                |  |
|                   | N                   |              |                        |         |             | Y                     | Y            | Logistic          | OR=1.11 (CL NR)        | <0.001                                                                                                                                         |                                                                                                                                                                                                                                                                                                                        | NR                |  |
| Tuttolomondo      | Y                   | Y            | NR                     | <0.005  | NR          | N                     |              |                   |                        |                                                                                                                                                |                                                                                                                                                                                                                                                                                                                        |                   |  |
|                   | Y                   | N            | NR                     | 0.71    | NR          | Y                     | Y            | Logistic          | OR=2.44 (1.7-8.5)      | ≤0.0001                                                                                                                                        | age; Glucose level; SBP; WBC; Medications; #=13                                                                                                                                                                                                                                                                        | NR                |  |
| Nigro             | Y                   | Y            | OR=1.3(1.1-1.6)        | <0.001  | NR          | Y                     | N            | Logistic          | OR=1.2 (0.8-1.6)       | 0.34                                                                                                                                           | BNP; age; gender; stroke severity (NIHSS); CRP; History of heart failure; Atrial fibrillation; lesion size; #=9                                                                                                                                                                                                        | NR                |  |
|                   | Y                   | Y            | OR=1.4 (1.2-1.6)       | <0.001  | NR          | Y                     | N            | Logistic          | OR=1.2 (0.9-1.5)       | 0.29                                                                                                                                           | BNP; age; stroke severity (NIHSS); History of heart failure; Atrial fibrillation; lesion size; #=7                                                                                                                                                                                                                     | NR                |  |
| Denti             | Y                   | N            | OR=1.62 (0.98-2.68)    | 0.06    | AUC=0.56    | Y                     | N            | Logistic          | OR=1.7 (1.01-2.84)     | 0.04                                                                                                                                           | age                                                                                                                                                                                                                                                                                                                    | AUC=0.879         |  |
|                   |                     |              |                        |         |             |                       |              |                   | OR=1.37 (0.73-2.55)    | 0.32                                                                                                                                           | age; neurologic scores (SSS and GCS);                                                                                                                                                                                                                                                                                  |                   |  |
|                   | Y                   | N            | OR=1.45 (0.86-2.45)    | 0.17    |             | Y                     | N            |                   | OR=1.31 (0.68-2.52)    | 0.42                                                                                                                                           | age; neurologic scores; premorbid disability; #=4                                                                                                                                                                                                                                                                      |                   |  |
|                   |                     |              |                        |         |             |                       |              |                   | OR=1.53 (0.9-2.66)     | 0.12                                                                                                                                           | age                                                                                                                                                                                                                                                                                                                    |                   |  |
|                   | Y                   | Y            | OR=2.74 (1.64-4.59)    | 0.0001  | AUC=0.64    | Y                     | Y            |                   | OR=1.33 (0.71-2.50)    | 0.37                                                                                                                                           | age; neurologic scores (SSS and GCS);                                                                                                                                                                                                                                                                                  |                   |  |
|                   |                     |              |                        |         |             |                       |              |                   | OR=1.31 (0.68-2.53)    | 0.42                                                                                                                                           | age; neurologic scores; premorbid disability; #=4                                                                                                                                                                                                                                                                      |                   |  |
|                   | Y                   | Y            | OR=2.76 (1.62-4.72)    | 1.0001  |             | Y                     | N            |                   | OR=2.44 (1.44-4.13)    | 0.001                                                                                                                                          | age                                                                                                                                                                                                                                                                                                                    |                   |  |
|                   |                     |              |                        |         |             |                       |              |                   | OR=1.47 (0.78-2.77)    | 0.23                                                                                                                                           | age; neurologic scores (SSS and GCS);                                                                                                                                                                                                                                                                                  |                   |  |
|                   |                     |              |                        |         |             |                       |              |                   | OR=1.21 (.62-2.37)     | 0.57                                                                                                                                           | age; neurologic scores; premorbid disability;                                                                                                                                                                                                                                                                          |                   |  |
|                   |                     |              |                        |         |             |                       |              |                   | OR=2.54 (1.48-4.37)    | 0.001                                                                                                                                          | age                                                                                                                                                                                                                                                                                                                    |                   |  |
|                   |                     |              |                        |         |             |                       |              |                   | OR=1.65 (.88-3.09)     | 0.12                                                                                                                                           | age; neurologic scores (SSS and GCS);                                                                                                                                                                                                                                                                                  |                   |  |
|                   |                     |              |                        |         |             |                       |              |                   | OR=1.38 (.71-2.68)     | 0.35                                                                                                                                           | age; neurologic scores; premorbid disability;                                                                                                                                                                                                                                                                          |                   |  |
| Lopez-Espuela     | N                   |              |                        |         | Y           | N                     | Linear       | β= -0.149 (CL NR) | 0.054                  | gender; BI and IADL at hospital discharge; #=4                                                                                                 | adjusted R <sup>2</sup> =0.282                                                                                                                                                                                                                                                                                         |                   |  |
|                   | N                   |              |                        |         | Y           | Y                     | Linear       | β= -0.225 (CL NR) | 0.003                  | gender; BI and IADL at hospital discharge; social risk (family situation, economic situation, housing, relationships, and social support); #=5 | adjusted R <sup>2</sup> =0.313                                                                                                                                                                                                                                                                                         |                   |  |
| Chang             | Y                   | Y            | OR=0.902 (0.860-0.946) | <0.001  | NR          | Y                     | N            | ordinal logistic  | OR=0.987 (0.929-1.048) | 0.658                                                                                                                                          | age; gender; Behavior factors (BMI, smoking and alcohol); education; Individual medical conditions; premorbid mRS; stroke severity (NIHSS at admission); Neurologic aggravation; Complications during hospital stay; LOS; Functional level at discharge; neurologic aggravation; Ambulation; swallowing; Aphasia; #=24 | NR                |  |
| López-Espuela     | Y                   | N            | OR=1.233 (0.962-1.579) | 0.1     | NR          | Y                     | N            | ordinal logistic  | OR=1.292 (0.973-1.716) | 0.08                                                                                                                                           | Gender; age; Stroke severity (NIHSS); Depression; Social risk; #=5                                                                                                                                                                                                                                                     | NR                |  |

**Table 4. Risk of Bias Assessment of the Included Studies**

| Cohort type          | First author      | Year     | D1  | D2 | D3  | D4 | D5  | A1 | A2 | A3  | A4 | M1 | M2 | M3 | M4 | M5 | O1 | O2 | O3 | O4 | O5 | S1 | S2 | S3 | S4 | C1  | C2  | P1 | Total Score | Mean | Median | Min  | Max |      |
|----------------------|-------------------|----------|-----|----|-----|----|-----|----|----|-----|----|----|----|----|----|----|----|----|----|----|----|----|----|----|----|-----|-----|----|-------------|------|--------|------|-----|------|
| Rehabilitation-based | Liu               | 1997     | 1   | 1  | 1   | 1  | 1   | 0  | 0  | 0   | 0  | 0  | 1  | 0  | 0  | 0  | 0  | 0  | 0  | 0  | 1  | 0  | 1  | 1  | 1  | 0   | 1   | 1  | 0           | 12   | 11     | 11   | 8.5 | 13.5 |
|                      | Desrosiers        | 2002     | 1   | 0  | 1   | 1  | 0.5 | 1  | 0  | 0   | 1  | 0  | 1  | 0  | 0  | 0  | 0  | 0  | 1  | 0  | 1  | 0  | 1  | 1  | 1  | 0   | 0.5 | 1  | 0           | 13   |        |      |     |      |
|                      | Duncan            | 2002     | 1   | 0  | 1   | 0  | 0.5 | 1  | 0  | 1   | 1  | 0  | 0  | 0  | 1  | 0  | 0  | 0  | 0  | 0  | 0  | 0  | 1  | 0  | 0  | 0.5 | 1   | 0  | 9           |      |        |      |     |      |
|                      | Desrosiers        | 2006     | 1   | 0  | 1   | 1  | 1   | 1  | 0  | 0   | 1  | 0  | 1  | 0  | 0  | 0  | 0  | 0  | 1  | 0  | 1  | 0  | 1  | 1  | 1  | 0   | 0.5 | 1  | 0           | 13.5 |        |      |     |      |
|                      | Ferriero          | 2006     | 1   | 0  | 1   | 0  | 0.5 | 0  | 0  | 0   | 0  | 0  | 0  | 0  | 0  | 0  | 0  | 0  | 0  | 1  | 0  | 1  | 1  | 1  | 0  | 1   | 1   | 0  | 8.5         |      |        |      |     |      |
|                      | Karatepe          | 2008     | 1   | 0  | 1   | 1  | 0.5 | 1  | 0  | 0   | 1  | 0  | 1  | 0  | 0  | 0  | 0  | 0  | 0  | 0  | 1  | 0  | 1  | 1  | 0  | 0   | 0.5 | 0  | 0           | 10   |        |      |     |      |
| Hospital-based       | Goldstein         | 2004     | 0.5 | 0  | 0   | 0  | 0.5 | 0  | 0  | 0   | 0  | 0  | 0  | 0  | 0  | 0  | 0  | 0  | 0  | 1  | 0  | 0  | 1  | 1  | 1  | 0   | 0   | 0  | 1           | 6    | 4.875  | 4.75 | 1   | 9    |
|                      | Katan             | 2009     | 0.5 | 0  | 0   | 0  | 0   | 0  | 0  | 0.5 | 0  | 0  | 0  | 0  | 0  | 0  | 0  | 0  | 0  | 0  | 0  | 0  | 0  | 0  | 0  | 0   | 0   | 0  | 0           | 1    |        |      |     |      |
|                      | Fischer           | 2012     | 0.5 | 0  | 0.5 | 0  | 0   | 1  | 0  | 0   | 1  | 0  | 0  | 0  | 0  | 0  | 0  | 0  | 0  | 0  | 0  | 0  | 1  | 0  | 0  | 0   | 0   | 0  | 1           | 5    |        |      |     |      |
|                      | De Marchis        | 2013     | 0.5 | 0  | 0   | 0  | 0   | 0  | 0  | 0   | 0  | 0  | 0  | 0  | 0  | 0  | 0  | 0  | 0  | 0  | 0  | 0  | 1  | 0  | 0  | 0   | 0   | 0  | 0           | 1.5  |        |      |     |      |
|                      | Gensicke          | 2013     | 0.5 | 0  | 1   | 0  | 0   | 0  | 0  | 0   | 0  | 0  | 0  | 0  | 0  | 0  | 0  | 0  | 0  | 0  | 0  | 0  | 0  | 0  | 0  | 0   | 0   | 0  | 1           | 2.5  |        |      |     |      |
|                      | Jimenez Caballero | 2013     | 0.5 | 0  | 0   | 1  | 0   | 0  | 0  | 0   | 0  | 0  | 0  | 0  | 0  | 0  | 0  | 0  | 0  | 0  | 0  | 0  | 1  | 1  | 1  | 0   | 0   | 0  | 0           | 4.5  |        |      |     |      |
|                      | Tuttolomondo      | 2013     | 0.5 | 0  | 0   | 0  | 1   | 1  | 0  | 0   | 1  | 0  | 0  | 0  | 0  | 0  | 0  | 0  | 0  | 1  | 0  | 0  | 1  | 0  | 1  | 0.5 | 1   | 1  | 9           |      |        |      |     |      |
|                      | Nigro             | 2014     | 0.5 | 0  | 0.5 | 0  | 0.5 | 1  | 0  | 1   | 1  | 0  | 0  | 0  | 1  | 0  | 0  | 0  | 1  | 1  | 0  | 0  | 0  | 0  | 0  | 0   | 0   | 0  | 1           | 8.5  |        |      |     |      |
|                      | Denti             | 2015     | 0.5 | 1  | 1   | 1  | 0   | 0  | 0  | 0   | 0  | 0  | 0  | 0  | 0  | 0  | 0  | 0  | 0  | 0  | 0  | 0  | 0  | 0  | 0  | 0   | 0   | 1  | 0           | 4.5  |        |      |     |      |
|                      | Lopez-Espuela     | 2015     | 0.5 | 0  | 0.5 | 0  | 0   | 0  | 0  | 0   | 0  | 0  | 0  | 0  | 1  | 0  | 0  | 0  | 0  | 0  | 0  | 0  | 1  | 1  | 0  | 1   | 1   | 0  | 6           |      |        |      |     |      |
|                      | Chang             | 2016     | 0.5 | 0  | 0.5 | 0  | 0   | 1  | 0  | 1   | 1  | 0  | 0  | 0  | 1  | 0  | 0  | 0  | 0  | 0  | 0  | 0  | 0  | 0  | 0  | 0   | 0   | 0  | 1           | 6    |        |      |     |      |
|                      | Lopez-Espuela     | 2016     | 0.5 | 0  | 0.5 | 1  | 0   | 0  | 0  | 0   | 0  | 0  | 0  | 0  | 0  | 1  | 0  | 0  | 0  | 0  | 0  | 0  | 0  | 0  | 0  | 0   | 0   | 0  | 1           | 4    |        |      |     |      |
|                      | Mean score        | 6.916667 |     |    |     |    |     |    |    |     |    |    |    |    |    |    |    |    |    |    |    |    |    |    |    |     |     |    |             |      |        |      |     |      |
|                      | Median            | 6        |     |    |     |    |     |    |    |     |    |    |    |    |    |    |    |    |    |    |    |    |    |    |    |     |     |    |             |      |        |      |     |      |
|                      | Min               | 1        |     |    |     |    |     |    |    |     |    |    |    |    |    |    |    |    |    |    |    |    |    |    |    |     |     |    |             |      |        |      |     |      |
|                      | Max               | 13.5     |     |    |     |    |     |    |    |     |    |    |    |    |    |    |    |    |    |    |    |    |    |    |    |     |     |    |             |      |        |      |     |      |



**Table 5. PRISMA Checklist**

| Section/topic                      | #  | Checklist item                                                                                                                                                                                                                                                                                              | Reported on page #            |
|------------------------------------|----|-------------------------------------------------------------------------------------------------------------------------------------------------------------------------------------------------------------------------------------------------------------------------------------------------------------|-------------------------------|
| <b>TITLE</b>                       |    |                                                                                                                                                                                                                                                                                                             |                               |
| Title                              | 1  | Identify the report as a systematic review, meta-analysis, or both.                                                                                                                                                                                                                                         | Title page                    |
| <b>ABSTRACT</b>                    |    |                                                                                                                                                                                                                                                                                                             |                               |
| Structured summary                 | 2  | Provide a structured summary including, as applicable: background; objectives; data sources; study eligibility criteria, participants, and interventions; study appraisal and synthesis methods; results; limitations; conclusions and implications of key findings; systematic review registration number. | 1-2                           |
| <b>INTRODUCTION</b>                |    |                                                                                                                                                                                                                                                                                                             |                               |
| Rationale                          | 3  | Describe the rationale for the review in the context of what is already known.                                                                                                                                                                                                                              | 3-4                           |
| Objectives                         | 4  | Provide an explicit statement of questions being addressed with reference to participants, interventions, comparisons, outcomes, and study design (PICOS).                                                                                                                                                  | 4                             |
| <b>METHODS</b>                     |    |                                                                                                                                                                                                                                                                                                             |                               |
| Protocol and registration          | 5  | Indicate if a review protocol exists, if and where it can be accessed (e.g., Web address), and, if available, provide registration information including registration number.                                                                                                                               | 5-7                           |
| Eligibility criteria               | 6  | Specify study characteristics (e.g., PICOS, length of follow-up) and report characteristics (e.g., years considered, language, publication status) used as criteria for eligibility, giving rationale.                                                                                                      | 5-6                           |
| Information sources                | 7  | Describe all information sources (e.g., databases with dates of coverage, contact with study authors to identify additional studies) in the search and date last searched.                                                                                                                                  | 5, Figure 1                   |
| Search                             | 8  | Present full electronic search strategy for at least one database, including any limits used, such that it could be repeated.                                                                                                                                                                               | Supplemental Table 1          |
| Study selection                    | 9  | State the process for selecting studies (i.e., screening, eligibility, included in systematic review, and, if applicable, included in the meta-analysis).                                                                                                                                                   | Figure 1, 9                   |
| Data collection process            | 10 | Describe method of data extraction from reports (e.g., piloted forms, independently, in duplicate) and any processes for obtaining and confirming data from investigators.                                                                                                                                  | 6-7                           |
| Data items                         | 11 | List and define all variables for which data were sought (e.g., PICOS, funding sources) and any assumptions and simplifications made.                                                                                                                                                                       | 6-7<br>Supplemental Table 3   |
| Risk of bias in individual studies | 12 | Describe methods used for assessing risk of bias of individual studies (including specification of whether this was done at the study or outcome level), and how this information is to be used in any data synthesis.                                                                                      | 6-7<br>Supplemental Table 2&4 |
| Summary                            | 13 | State the principal summary measures (e.g., risk ratio, difference in means).                                                                                                                                                                                                                               | 7                             |

|                               |    |                                                                                                                                                                                                          |                      |
|-------------------------------|----|----------------------------------------------------------------------------------------------------------------------------------------------------------------------------------------------------------|----------------------|
| measures                      |    |                                                                                                                                                                                                          |                      |
| Synthesis of results          | 14 | Describe the methods of handling data and combining results of studies, if done, including measures of consistency (e.g., $I^2$ ) for each meta-analysis.                                                | 7-8                  |
| Risk of bias across studies   | 15 | Specify any assessment of risk of bias that may affect the cumulative evidence (e.g., publication bias, selective reporting within studies).                                                             | 7                    |
| Additional analyses           | 16 | Describe methods of additional analyses (e.g., sensitivity or subgroup analyses, meta-regression), if done, indicating which were pre-specified.                                                         | 7-8                  |
| <b>RESULTS</b>                |    |                                                                                                                                                                                                          |                      |
| Study selection               | 17 | Give numbers of studies screened, assessed for eligibility, and included in the review, with reasons for exclusions at each stage, ideally with a flow diagram.                                          | Figure 1             |
| Study characteristics         | 18 | For each study, present characteristics for which data were extracted (e.g., study size, PICOS, follow-up period) and provide the citations.                                                             | Supplemental Table 3 |
| Risk of bias within studies   | 19 | Present data on risk of bias of each study and, if available, any outcome level assessment (see item 12).                                                                                                | Supplemental Table 4 |
| Results of individual studies | 20 | For all outcomes considered (benefits or harms), present, for each study: (a) simple summary data for each intervention group (b) effect estimates and confidence intervals, ideally with a forest plot. | Figure 2,3           |
| Synthesis of results          | 21 | Present results of each meta-analysis done, including confidence intervals and measures of consistency.                                                                                                  | 12-13, Figure 2      |
| Risk of bias across studies   | 22 | Present results of any assessment of risk of bias across studies (see Item 15).                                                                                                                          | Figure 3             |
| Additional analysis           | 23 | Give results of additional analyses, if done (e.g., sensitivity or subgroup analyses, meta-regression [see Item 16]).                                                                                    | Figure 2             |
| <b>DISCUSSION</b>             |    |                                                                                                                                                                                                          |                      |
| Summary of evidence           | 24 | Summarize the main findings including the strength of evidence for each main outcome; consider their relevance to key groups (e.g., healthcare providers, users, and policy makers).                     | 14                   |
| Limitations                   | 25 | Discuss limitations at study and outcome level (e.g., risk of bias), and at review-level (e.g., incomplete retrieval of identified research, reporting bias).                                            | 14-17                |
| Conclusions                   | 26 | Provide a general interpretation of the results in the context of other evidence, and implications for future research.                                                                                  | 17                   |
| <b>FUNDING</b>                |    |                                                                                                                                                                                                          |                      |
| Funding                       | 27 | Describe sources of funding for the systematic review and other support (e.g., supply of data); role of funders for the systematic review.                                                               | 18                   |

## SUPPLEMENTAL REFERENCE

1. Cheema JR. Some general guidelines for choosing missing data handling methods in educational research. *Journal of Modern Applied Statistical Methods*. 2014;13:3
2. Dong Y, Peng CY. Principled missing data methods for researchers. *Springerplus*. 2013;2:222
3. Schafer JL. Multiple imputation: A primer. *Stat Methods Med Res*. 1999;8:3-15
4. Peduzzi P, Concato J, Kemper E, Holford TR, Feinstein AR. A simulation study of the number of events per variable in logistic regression analysis. *J Clin Epidemiol*. 1996;49:1373-1379
5. Green SB. How many subjects does it take to do a regression analysis. *Multivariate Behav Res*. 1991;26:499-510
6. VanVoorhis CW, Morgan BL. Understanding power and rules of thumb for determining sample sizes. *Tutorials in Quantitative Methods for Psychology*. 2007;3:43-50
7. Altman DG. Systematic reviews of evaluations of prognostic variables. *BMJ*. 2001;323:224-228
8. Veerbeek JM, Kwakkel G, van Wegen EE, Ket JC, Heymans MW. Early prediction of outcome of activities of daily living after stroke: A systematic review. *Stroke*. 2011;42:1482-1488
